# Supplementary material for: Insights on the binding and selectivity of surfen towards different DNA topologies
Source: Royal Society of Chemistry journal article supplement (doi:10.1039/d5cp02724a), 2025-11-28
Supplement: d5cp02724a1.pdf [file d5cp02724a1.pdf]

## Insights on Binding and Selectivity of Surfen Towards Different DNA Topologies

Laxmi Kashyap<sup>a</sup>, Kritika Varshney<sup>a</sup>, Manoj Munde<sup>a\*</sup>

<sup>1</sup> School of Physical Sciences, Jawaharlal Nehru University, New Delhi-110067, India

\*Corresponding Author

\*Manoj Munde;

Email: mundemanoj@gmail.com

**Table S1:** Interaction between surfen and various DNAs used in this study

### Duplex DNA

| Donor                                                     | Acceptor                                                                                                                                                        | D-H..A distance (Å) |
|-----------------------------------------------------------|-----------------------------------------------------------------------------------------------------------------------------------------------------------------|---------------------|
| -NH <sub>2</sub> group of the amino-quinoline compound    | T19 (Oxygen atom of the carbonyl functional group attached to the C2 carbon of the thymine pyrimidine ring)                                                     | 2.060               |
| -NH group of the amino-quinoline compound                 | T8 (Oxygen atom of the carbonyl functional group attached to the C2 carbon of the thymine pyrimidine ring of chain A)                                           | 1.938               |
| -NH group of the amino-quinoline compound                 | T8 (Oxygen atom of the carbonyl functional group attached to the C2 carbon of the thymine pyrimidine ring of chain A)                                           | 2.232               |
| an -NH <sub>2</sub> group of the amino-quinoline compound | C9 (Chain A oxygen atom double-bonded to the C2 carbon of the cytosine ring.) of chain A interacts with the -NH <sub>2</sub> group of the amino-quinoline ring. | 1.921               |

### AP Q-DNA

| Donor                                                     | Acceptor                                                                | D-H..A distance (Å) |
|-----------------------------------------------------------|-------------------------------------------------------------------------|---------------------|
| -NH group of the amino-quinoline compound                 | OP2, a non-bridging oxygen atom in the phosphate group connected to G16 | 1.836               |
| -NH group of the amino-quinoline compound                 | OP2, a non-bridging oxygen atom in the phosphate group connected to G16 | 2.124               |
| an -NH <sub>2</sub> group of the amino-quinoline compound | OP2, a non-bridging oxygen atom in the phosphate group connected to T17 | 2.161               |
| G20-Nitrogen atom in the                                  | Oxygen atom at 2 <sup>nd</sup> position                                 | 3.452               |

|                                                                                |           |  |
|--------------------------------------------------------------------------------|-----------|--|
| exocyclic amino group (–NH <sub>2</sub> ) attached to the C2 carbon of guanine | of Surfen |  |
|--------------------------------------------------------------------------------|-----------|--|

#### HB Q-DNA

| <b>Donor</b>                                                                                              | <b>Acceptor</b>                                                                  | <b>D-H...A distance (Å)</b> |
|-----------------------------------------------------------------------------------------------------------|----------------------------------------------------------------------------------|-----------------------------|
| –NH <sub>2</sub> group of the amino-quinoline compound                                                    | oxygen atom bonded to the 3' carbon of the sugar ring in the DNA backbone at G11 | 2.202                       |
| G11 (nitrogen atom in the exocyclic amino group (–NH <sub>2</sub> ) attached to the C2 carbon of guanine) | –NH group of the amino-quinoline compound                                        | 2.182                       |

**Table S2: Time-resolved fluorescence decay parameters of surfen measured with and without DNA.**

| <b>Complex</b>           | <b>T1(ns)</b>  | <b>T2(ns)</b>   | <b>T3(ns)</b>   | <b>Average life time(<math>\tau_a</math>)(ns)</b> | <b><math>\chi^2</math></b> |
|--------------------------|----------------|-----------------|-----------------|---------------------------------------------------|----------------------------|
| <b>Surfen</b>            | <b>1.34023</b> | <b>0.528643</b> | <b>0.233114</b> | <b>1.459455</b>                                   | <b>1.13357</b>             |
| <b>Surfen-GQ(AP)</b>     | <b>2.03146</b> | <b>0.693939</b> | <b>0.458109</b> | <b>2.195054</b>                                   | <b>1.050276</b>            |
| <b>Surfen-GQ(H)</b>      | <b>1.77727</b> | <b>0.780467</b> | <b>0.327037</b> | <b>1.968442</b>                                   | <b>1.031221</b>            |
| <b>Surfen-Duplex DNA</b> | <b>4.1457</b>  | <b>0.680807</b> | <b>0.537048</b> | <b>4.235</b>                                      | <b>1.23653</b>             |

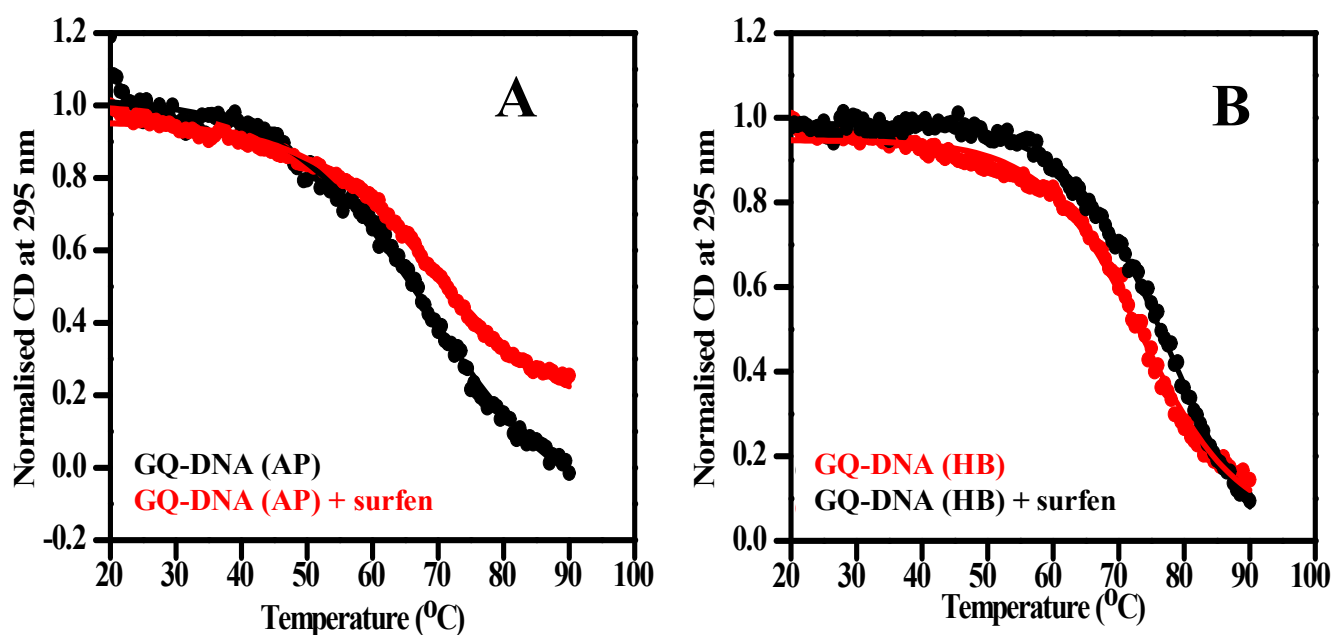

**Fig S1:** CD melting profiles of GQ-DNA (1  $\mu$ M) at 295 nm in the absence and presence of surfen (1.5  $\mu$ M) for (A) AP GQ-DNA and (B) HB GQ-DNA.

CD melting studies assess the thermal stability of different types of DNA, both with and without ligands, by comparing their melting temperatures ( $T_m$ ), which represent the midpoint of the melting transition at specific wavelengths. Using Figure 7 (A, B) to illustrate the change in ellipticity at 295 nm, we investigated the melting of Surfen-quadruplex complexes in potassium ion (hybrid topology) and sodium ion (antiparallel topology). The melting temperature of GQ-DNA (AP) and GQ-DNA (HB), respectively, is 65°C and 67°C when the ligand is not present. GQ-DNA's melting temperature increases by 3°C when hybrid GQ DNA is present and by 2°C when antiparallel GQ DNA is present

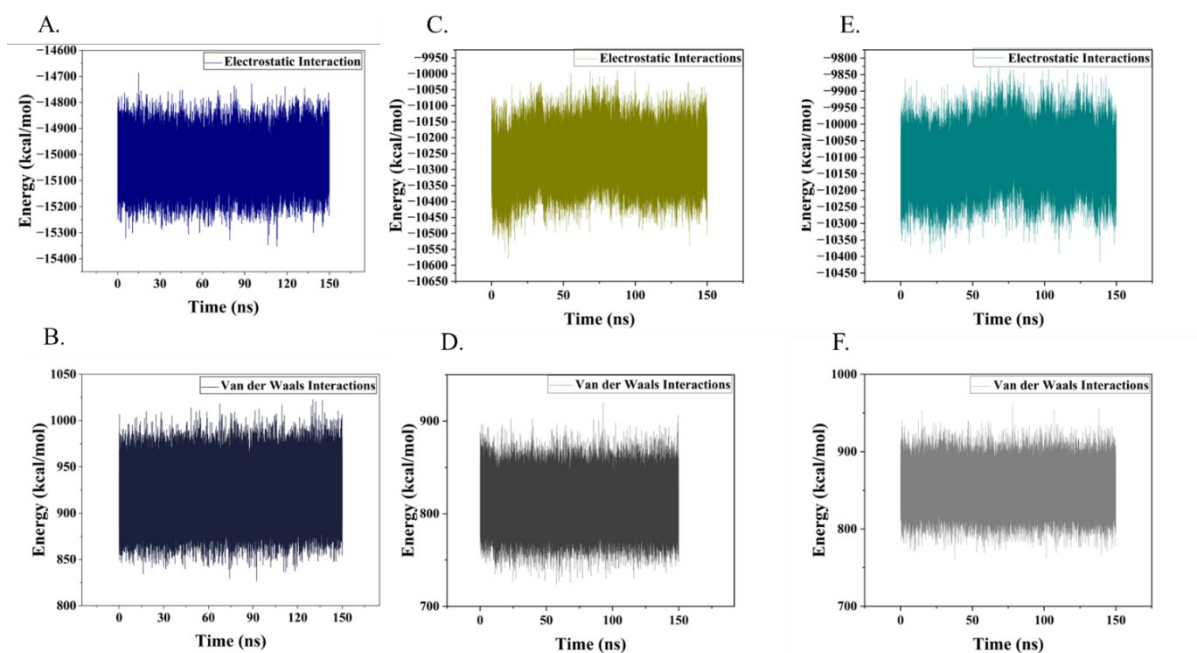

**Fig S2.** The contribution of surfen binding (A) electrostatic and (B) Van der Waals interactions with dsDNA; (C) electrostatic and (D) Van der Waals interactions with AP GQ-DNA; (E) electrostatic and (F) Van der Waals interactions with HB GQ-DNA.

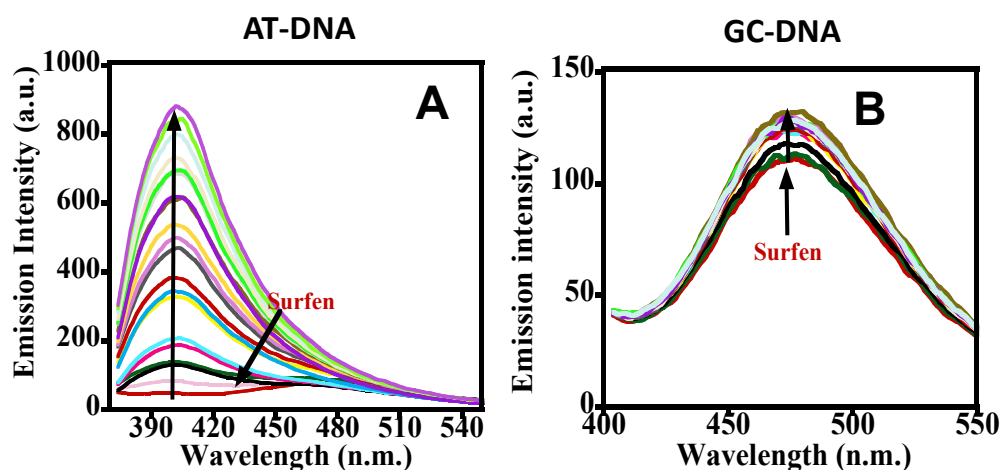

**Fig S3:** Binding of surfen using fluorescence with (A) AT-DNA and (B) GC-DNA. The concentration of surfen was used as 1  $\mu$ M and DNA was titrated from 0.01 to 1  $\mu$ M per DNA strand concentration. Surfen binds very strongly with AT-DNA compared to GC-DNA.
